# Supplementary material for: High-performance fluorescence sensing of lanthanum ions (La3+) by a polydentate pyridyl-based quinoxaline derivative
Source: Royal Society of Chemistry journal article supplement (doi:10.1039/c6dt01161f), 2016-01-01
Supplement: c6dt01161f1.pdf [file c6dt01161f1.pdf]

**Supporting Information (SI)**

**High-Performance Fluorescent Sensing of Lanthanum ion  
(La<sup>3+</sup>) by Polydentate Pyridyl-based Quinoxaline Derivative**

*Qiang Zhao, Xiu-Ming Liu, Huan-Rong Li, Ying-Hui Zhang\* and Xian-He Bu*

**Synthesis of HPDQ-La.** In a tube, a CH<sub>2</sub>Cl<sub>2</sub>/CH<sub>3</sub>CN (v: v = 1: 1, 10 mL) was carefully layered over a CH<sub>2</sub>Cl<sub>2</sub> (3 mL) solution of HPDQ (0.05 mmol) as a buffer layer, over which, a solution of La(NO<sub>3</sub>)<sub>3</sub> · 6H<sub>2</sub>O (0.15 mmol) in CH<sub>3</sub>CN (3 mL) was carefully added. This was left undisturbed at room temperature, and dark-yellow block-shaped crystals were harvested after about four weeks. FT-IR (KBr pellets, cm<sup>-1</sup>): 1653w, 1575w, 1559w, 1458s, 1374s, 1302s, 1168m, 1033w, 1003w, 817w, 735w, 555w.

#### **X-ray Data Collection and Structure Determinations.**

X-ray single-crystal diffraction data for **HPDQ-La** was collected on a SCX-Mini diffractometer at 293(2) K with Mo-K $\alpha$  radiation ( $\lambda = 0.71073 \text{ \AA}$ ) by  $\omega$  scan mode. The program SAINT<sup>12</sup> was used for integration of the diffraction profiles. All the structures were solved by direct methods using the SHELXS program of the SHELXTL package and refined by full-matrix least-squares methods with SHELXL (semi-empirical absorption corrections were applied using SADABS program).<sup>13</sup> Metal atoms in each complex were located from *E*-maps and other non-hydrogen atoms were located in successive difference Fourier syntheses and refined with anisotropic thermal parameters on  $F^2$ . The hydrogen atoms of the ligands were generated theoretically onto the specific atoms and refined isotropically with fixed thermal factors.

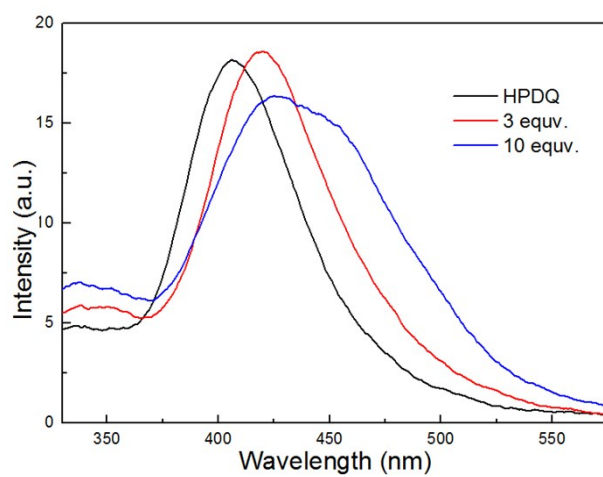

Fig. S1 Fluorescence emission spectra of HPDQ ( $1 \times 10^{-5} \text{ mol}\cdot\text{L}^{-1}$ ) in  $\text{CH}_3\text{CN}$  (3 mL) upon addition of  $\text{La}^{3+}$ .

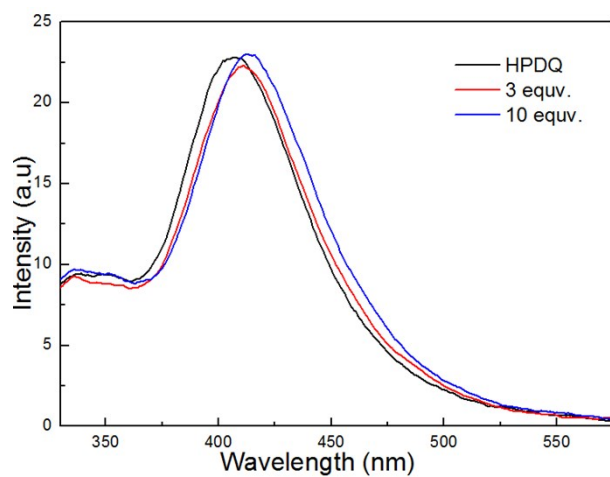

Fig. S2 Fluorescence emission spectra of HPDQ ( $5 \times 10^{-6} \text{ mol}\cdot\text{L}^{-1}$ ) in  $\text{CH}_3\text{CN}$  (3 mL) upon addition of  $\text{La}^{3+}$ .

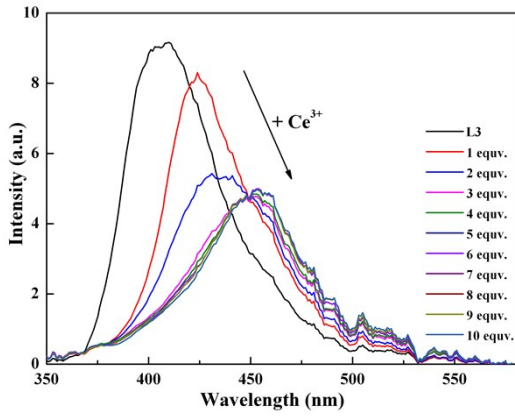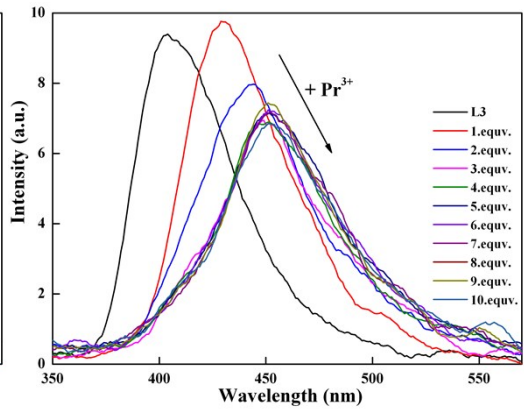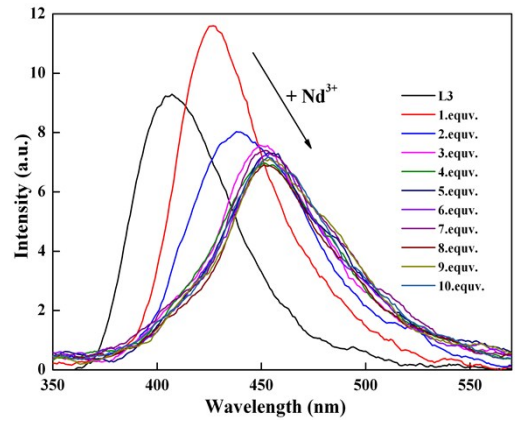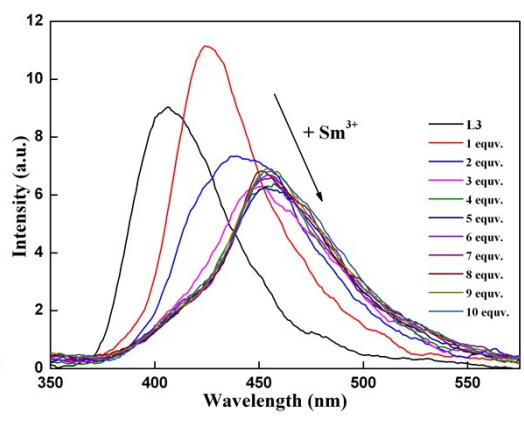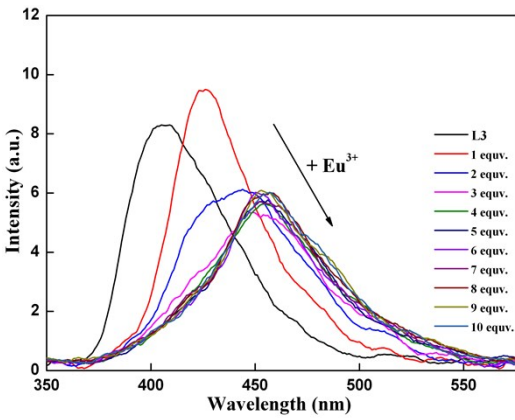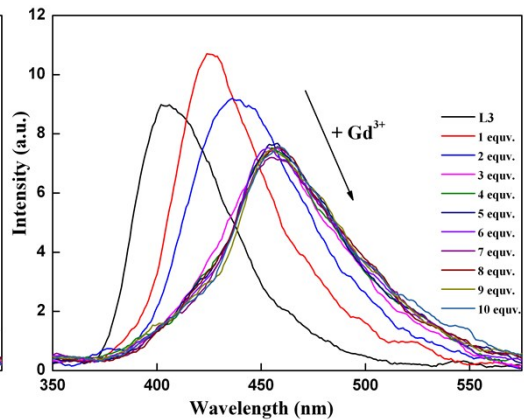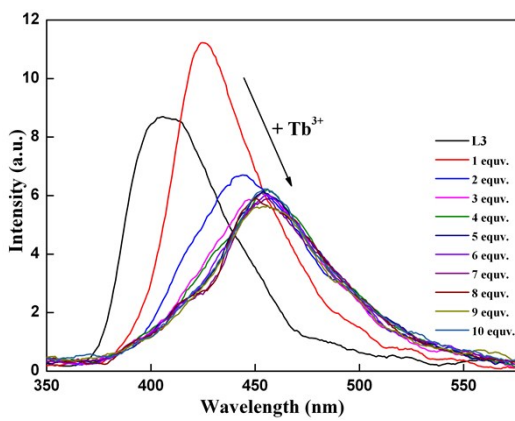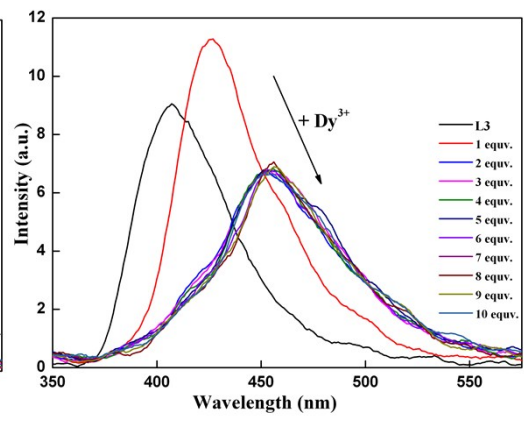

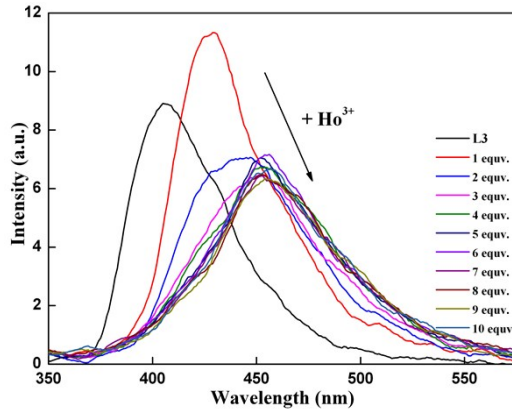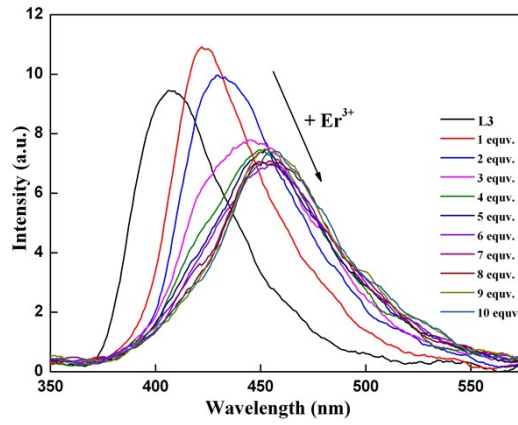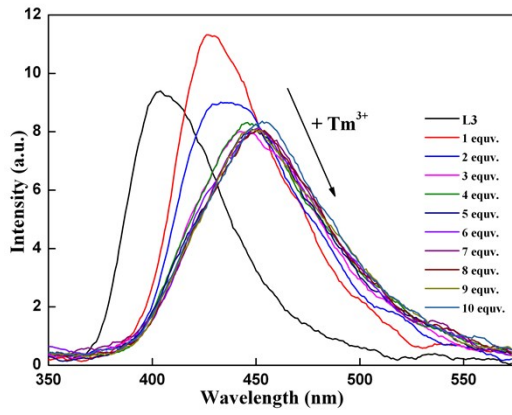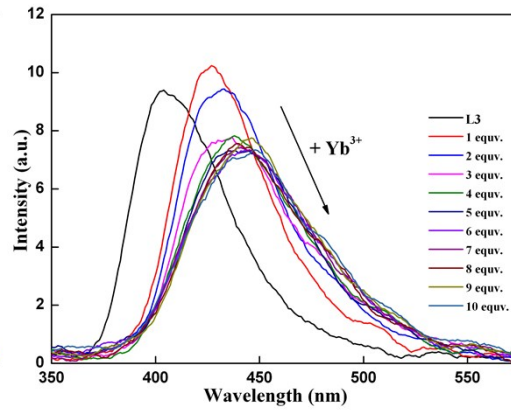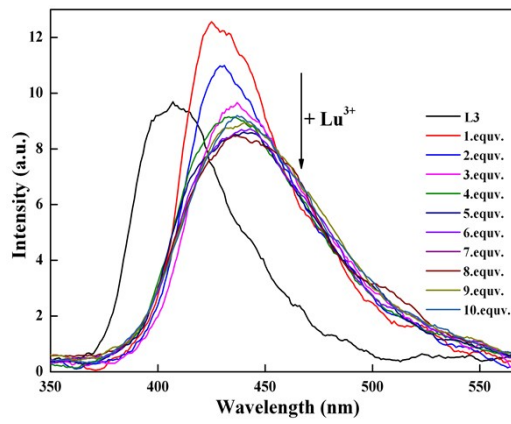

Fig. S3 Fluorescence emission spectra ( $\lambda_{\text{ex}} = 300 \text{ nm}$ ) of HPDQ ( $5 \times 10^{-5} \text{ mol}\cdot\text{L}^{-1}$ ) in  $\text{CH}_3\text{CN}$  (3 mL) upon the addition of  $\text{Ce}^{3+}$ ,  $\text{Pr}^{3+}$ ,  $\text{Nd}^{3+}$ ,  $\text{Sm}^{3+}$ ,  $\text{Eu}^{3+}$ ,  $\text{Gd}^{3+}$ ,  $\text{Tb}^{3+}$ ,  $\text{Dy}^{3+}$ ,  $\text{Ho}^{3+}$ ,  $\text{Er}^{3+}$ ,  $\text{Tm}^{3+}$ ,  $\text{Yb}^{3+}$ ,  $\text{Lu}^{3+}$  (0-10 equiv.), the excitation and emission slit widths were 5 nm.

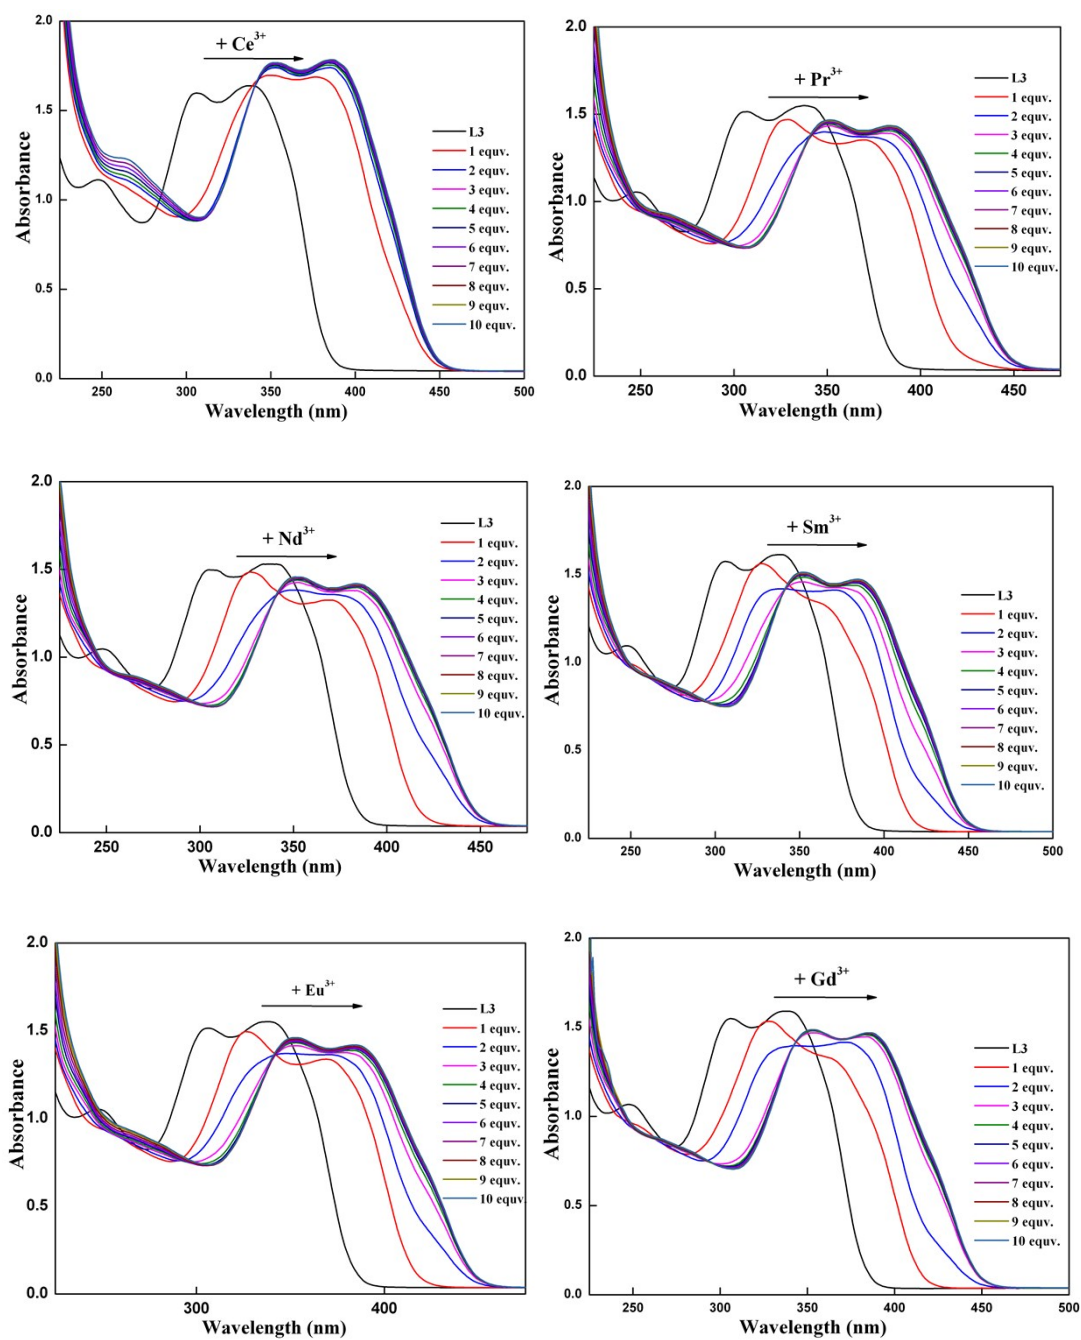

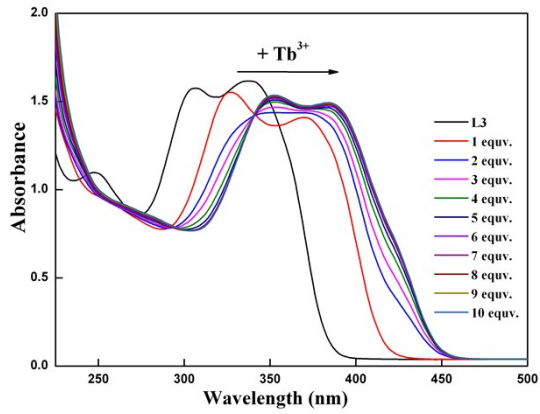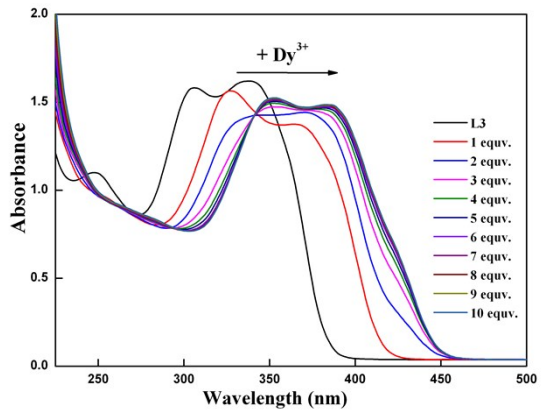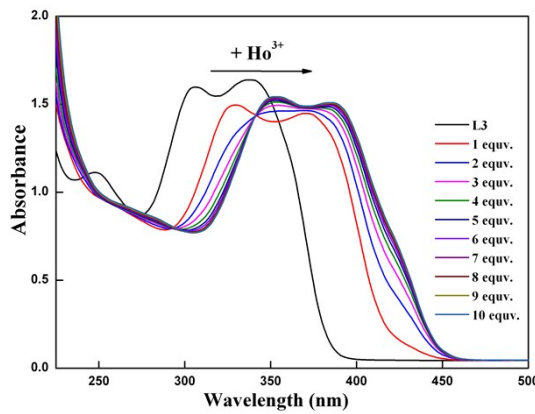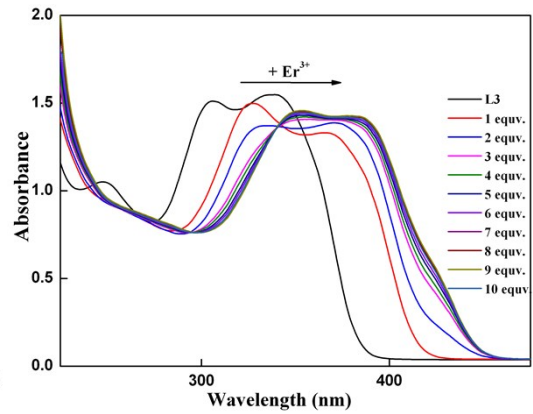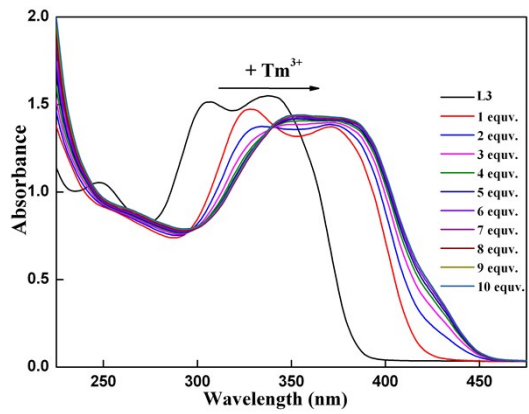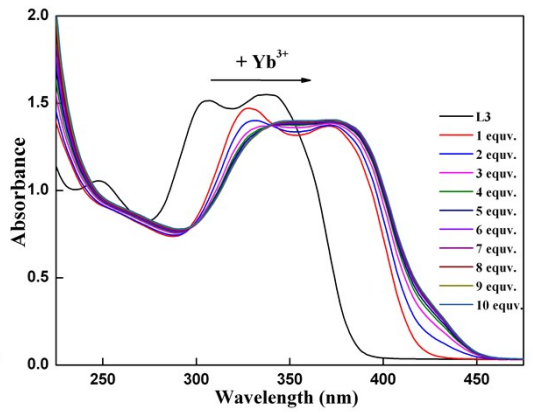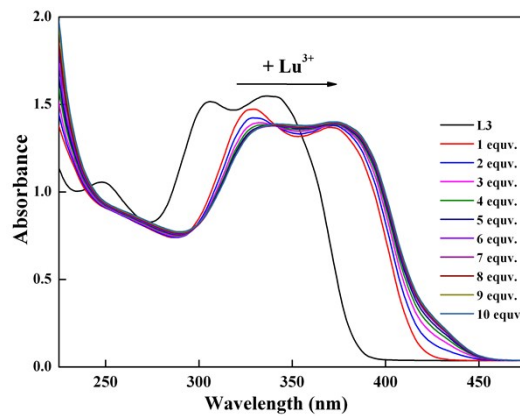



Fig.S4. The changes in UV/Vis spectra of HPDQ ( $2 \times 10^{-5} \text{ mol}\cdot\text{L}^{-1}$ ) in  $\text{CH}_3\text{CN}$  (3 mL) upon the addition of  $\text{Ce}^{3+}$ ,  $\text{Pr}^{3+}$ ,  $\text{Nd}^{3+}$ ,  $\text{Sm}^{3+}$ ,  $\text{Eu}^{3+}$ ,  $\text{Gd}^{3+}$ ,  $\text{Tb}^{3+}$ ,  $\text{Dy}^{3+}$ ,  $\text{Ho}^{3+}$ ,  $\text{Er}^{3+}$ ,  $\text{Tm}^{3+}$ ,  $\text{Yb}^{3+}$ ,  $\text{Lu}^{3+}$  (0,1,2,3,4,5,6,7,8,9,10 equiv.)

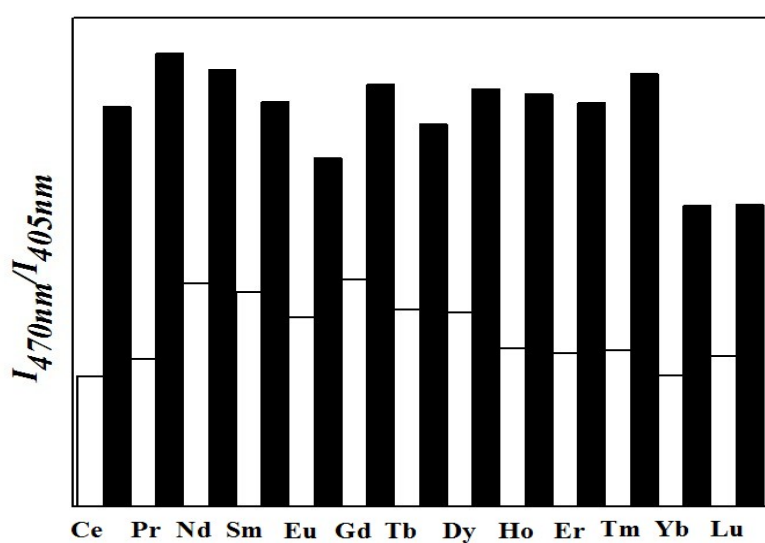

Fig. S5 Fluorescence responses of HPDQ to various metal ions in  $\text{CH}_3\text{CN}$  (3 mL). The bars represent the final fluorescence intensity at 470 nm over the original emission at 405 nm. White bars represent the addition of 3 equiv of different metal ions to HPDQ. Black bars represent the subsequent addition of 3 equiv of  $\text{La}^{3+}$  to the solution.

Table S1. The planarity change of HPDQ upon  $\text{La}^{3+}$  coordination based on DFT optimization (in degree).



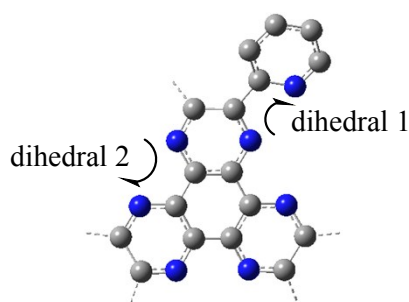

|                      | Averaged<br>dihedral 1 | Averaged<br>dihedral 2 |
|----------------------|------------------------|------------------------|
| HPDQ                 | 28.060                 | 3.974                  |
| HPDQ-La <sub>3</sub> | 14.920                 | 2.588                  |

Table S2. Crystal data and structure refinement parameters for complex

|                                   |                                                                                 |
|-----------------------------------|---------------------------------------------------------------------------------|
| Formula                           | C <sub>42</sub> H <sub>28</sub> La <sub>3</sub> N <sub>21</sub> O <sub>29</sub> |
| Formula weight                    | 1707.58                                                                         |
| Temperature                       | 293(2) K                                                                        |
| Crystal system                    | Monoclinic                                                                      |
| space group                       | P2/c                                                                            |
| a                                 | 16.847(3) Å                                                                     |
| b                                 | 16.642(3) Å                                                                     |
| c                                 | 24.017(5) Å                                                                     |
| alpha                             | 90 deg                                                                          |
| beta                              | 101.64(3) deg                                                                   |
| gamma                             | 90 deg                                                                          |
| Volume                            | 6595(2) Å <sup>3</sup>                                                          |
| Z                                 | 4                                                                               |
| Calculated density                | 1.721 Mg/m <sup>3</sup>                                                         |
| Absorption coefficient            | 2.005 mm <sup>-1</sup>                                                          |
| F(000)                            | 3320                                                                            |
| Crystal size                      | 0.21 x 0.20 x 0.17 mm                                                           |
| Theta range for data collection   | 2.98 to 25.01 deg                                                               |
| Limiting indices                  | -20 ≤ h ≤ 20, -19 ≤ k ≤ 19, -28 ≤ l ≤ 28                                        |
| Reflections collected / unique    | 53616 / 11608 [R(int) = 0.1064]                                                 |
| Completeness to theta = 25.01     | 99.8 %                                                                          |
| Goodness-of-fit on F <sup>2</sup> | 1.085                                                                           |
| Final R indices [I > 2σ(I)]       | R1 = 0.0833, wR2 = 0.1817                                                       |
| R indices (all data)              | R1 = 0.1287, wR2 = 0.2018                                                       |

Table S3. Bond lengths of La –N

---

|             |           |
|-------------|-----------|
| La(1)-N(4)  | 2.693(10) |
| La(1)-N(1)  | 2.714(10) |
| La(1)-N(2)  | 2.748(8)  |
| La(1)-N(3)  | 2.763(8)  |
| La(2)-N(15) | 2.742(9)  |
| La(2)-N(18) | 2.747(8)  |
| La(2)-N(17) | 2.775(8)  |
| La(3)-N(9)  | 2.755(8)  |
| La(3)-N(10) | 2.783(9)  |
| La(3)-N(8)  | 2.795(9)  |

---
